# Supplementary material for: Self-cleaning superhydrophobic films by supersonic-spraying polytetrafluoroethylene–titania nanoparticles
Source: Royal Society of Chemistry journal article supplement (doi:10.1039/c4ta06863g), 2015-01-01
Supplement: c4ta06863g1.pdf [file c4ta06863g1.pdf]

## Supporting Information

### **Self-cleaning superhydrophobic films by supersonic-spraying polytetrafluoroethylene-titania nanoparticles**

Do-Yeon Kim<sup>†</sup>, Jong-Gun Lee<sup>†</sup>, Bhavana N. Joshi<sup>†</sup>, Sanjay S. Latthe<sup>¶</sup>, Salem S. Al-Deyab<sup>‡</sup>,

Sam S. Yoon<sup>\*,†</sup>

<sup>†</sup> School of Mech. Eng., Korea University, Seoul, 136-713, Korea

<sup>¶</sup> Photocatalysis International Research Center, Research Institute for Science & Technology, Tokyo  
University of Science, Noda, Chiba 278-8510, Japan

<sup>‡</sup> Petrochemicals Research Chair, Department of Chemistry, College of Science, King Saud  
University, Riyadh 11451, Saudi Arabia

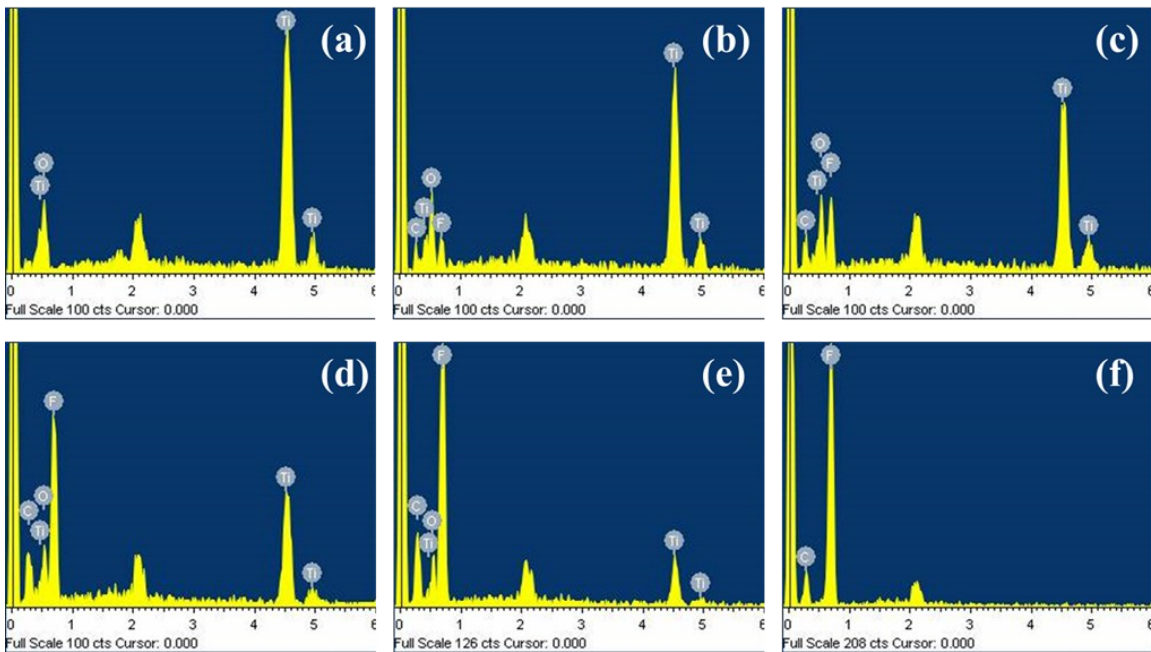

**Figure S1. Energy dispersive X-ray spectroscopy data for chemical composition of film surface produced using various PTFE-TiO<sub>2</sub> wt. % ratios.**

| <b>Case</b> | <b>Ti</b><br>[wt%] | <b>O</b><br>[wt%] | <b>F</b><br>[wt%] | <b>C</b><br>[wt%] |
|-------------|--------------------|-------------------|-------------------|-------------------|
| 1           | 62.78              | 37.22             | 0                 | 0                 |
| 2           | 45.23              | 28.79             | 20.6              | 5.38              |
| 3           | 38.69              | 25.15             | 30.03             | 6.13              |
| 4           | 22.02              | 12.49             | 53.08             | 12.41             |
| 5           | 9.82               | 8.05              | 62.18             | 19.95             |
| 6           | 0                  | 0                 | 76.67             | 23.33             |

**Table S1. The raw energy dispersive X-ray spectroscopy data for chemical composition of film surface produced using various PTFE-TiO<sub>2</sub> wt. % ratios.**

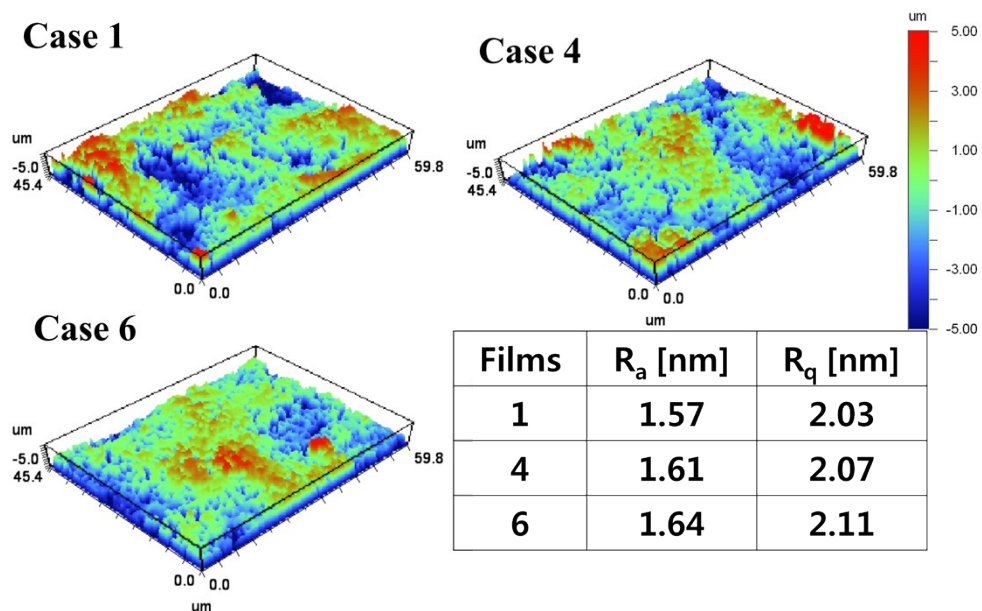

Figure S2. The optical profiler measurement of the films for Case 1, 4, and 6.

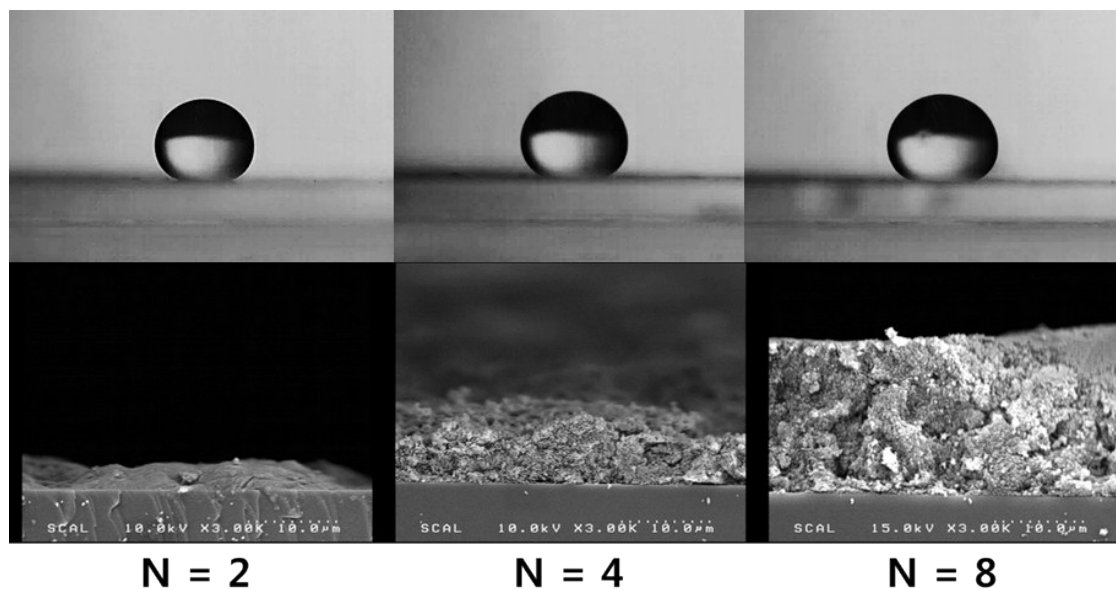

Figure S3. The water contact angle of the Case 1 films for  $N = 2, 4,$  and  $8,$  where  $N$  is the number of spraying sweep.
